# Supplementary material for: Evaluation of molecular descriptors for antitumor drugs with respect to noncovalent binding to DNA and antiproliferative activity
Source: PubMed Central journal article supplement (PMC2758867; doi:10.1186/1471-2210-9-11), 2009-09-16
Supplement: 1471-2210-9-11-S1.pdf [file 1471-2210-9-11-S1.pdf]

**Additional File 1.** Pearson correlations (r) and significance levels (*p*-values) calculated between all molecular descriptors and GI<sub>50</sub> values<sup>a</sup>.

|                  |                     | MW        | XlogP     | HbD       | HbA       | PSA       | Complexity | <i>logKeq</i> | Lipinski  | GI <sub>50</sub> |
|------------------|---------------------|-----------|-----------|-----------|-----------|-----------|------------|---------------|-----------|------------------|
| MW               | Pearson Correlation | 1         | -0.154    | .603(**)  | .912(**)  | .908(**)  | .976(**)   | -0.396        | -.646(**) | .542(*)          |
|                  | Sig. (1-tailed)     |           | 0.292     | 0.009     | 0.000     | 0.000     | 0.000      | 0.072         | 0.005     | 0.019            |
|                  | N                   | 15        | 15        | 15        | 15        | 15        | 15         | 15            | 15        | 15               |
| XlogP            | Pearson Correlation | -0.154    | 1         | -.660(**) | -0.395    | -0.434    | -0.106     | -.461(*)      | .505(*)   | 0.049            |
|                  | Sig. (1-tailed)     | 0.292     |           | 0.004     | 0.072     | 0.053     | 0.354      | 0.042         | 0.028     | 0.432            |
|                  | N                   | 15        | 15        | 15        | 15        | 15        | 15         | 15            | 15        | 15               |
| HbD              | Pearson Correlation | .603(**)  | -.660(**) | 1         | .782(**)  | .858(**)  | .472(*)    | 0.047         | -.604(**) | -0.023           |
|                  | Sig. (1-tailed)     | 0.009     | 0.004     |           | 0.000     | 0.000     | 0.038      | 0.434         | 0.009     | 0.468            |
|                  | N                   | 15        | 15        | 15        | 15        | 15        | 15         | 15            | 15        | 15               |
| HbA              | Pearson Correlation | .912(**)  | -0.395    | .782(**)  | 1         | .940(**)  | .852(**)   | -0.272        | -.810(**) | 0.439            |
|                  | Sig. (1-tailed)     | 0.000     | 0.072     | 0.000     |           | 0.000     | 0.000      | 0.163         | 0.000     | 0.051            |
|                  | N                   | 15        | 15        | 15        | 15        | 15        | 15         | 15            | 15        | 15               |
| PSA              | Pearson Correlation | .908(**)  | -0.434    | .858(**)  | .940(**)  | 1         | .845(**)   | -0.151        | -.738(**) | 0.286            |
|                  | Sig. (1-tailed)     | 0.000     | 0.053     | 0.000     | 0.000     |           | 0.000      | 0.296         | 0.001     | 0.151            |
|                  | N                   | 15        | 15        | 15        | 15        | 15        | 15         | 15            | 15        | 15               |
| Complexity       | Pearson Correlation | .976(**)  | -0.106    | .472(*)   | .852(**)  | .845(**)  | 1          | -0.373        | -.627(**) | .591(*)          |
|                  | Sig. (1-tailed)     | 0.000     | 0.354     | 0.038     | 0.000     | 0.000     |            | 0.086         | 0.006     | 0.010            |
|                  | N                   | 15        | 15        | 15        | 15        | 15        | 15         | 15            | 15        | 15               |
| <i>logKeq</i>    | Pearson Correlation | -0.396    | -.461(*)  | 0.047     | -0.272    | -0.151    | -0.373     | 1             | -0.071    | -0.277           |
|                  | Sig. (1-tailed)     | 0.072     | 0.042     | 0.434     | 0.163     | 0.296     | 0.086      |               | 0.401     | 0.159            |
|                  | N                   | 15        | 15        | 15        | 15        | 15        | 15         | 15            | 15        | 15               |
| Lipinski         | Pearson Correlation | -.646(**) | .505(*)   | -.604(**) | -.810(**) | -.738(**) | -.627(**)  | -0.071        | 1         | -0.397           |
|                  | Sig. (1-tailed)     | 0.005     | 0.028     | 0.009     | 0.000     | 0.001     | 0.006      | 0.401         |           | 0.071            |
|                  | N                   | 15        | 15        | 15        | 15        | 15        | 15         | 15            | 15        | 15               |
| GI <sub>50</sub> | Pearson Correlation | .542(*)   | 0.049     | -0.023    | 0.439     | 0.286     | .591(*)    | -0.277        | -0.397    | 1                |
|                  | Sig. (1-tailed)     | 0.019     | 0.432     | 0.468     | 0.051     | 0.151     | 0.010      | 0.159         | 0.071     |                  |
|                  | N                   | 15        | 15        | 15        | 15        | 15        | 15         | 15            | 15        | 15               |

<sup>a</sup>Correlations were significant at the \**p* < 0.05 or \*\**p* < 0.01 levels.
