# Supplementary material for: Evaluation of molecular descriptors for antitumor drugs with respect to noncovalent binding to DNA and antiproliferative activity
Source: PubMed Central journal article supplement (PMC2758867; doi:10.1186/1471-2210-9-11), 2009-09-16
Supplement: 1471-2210-9-11-S2.pdf [file 1471-2210-9-11-S2.pdf]

**Additional File 2.** Spearman's  $\rho$  correlations and significance levels ( $p$ -values) calculated between all molecular descriptors and GI<sub>50</sub> values<sup>a</sup>.

| Spearman's $\rho$ |                         | MW        | XlogP     | HbD       | HbA       | PSA       | Complexity | <i>logKeq</i> | Lipinski  | GI <sub>50</sub> |
|-------------------|-------------------------|-----------|-----------|-----------|-----------|-----------|------------|---------------|-----------|------------------|
| MW                | Correlation Coefficient | 1.000     | -0.211    | 0.361     | .969(**)  | .864(**)  | .983(**)   | -0.177        | -.747(**) | .635(**)         |
|                   | Sig. (1-tailed)         | .         | 0.225     | 0.093     | 0.000     | 0.000     | 0.000      | 0.264         | 0.001     | 0.006            |
|                   | N                       | 15        | 15        | 15        | 15        | 15        | 15         | 15            | 15        | 15               |
| XlogP             | Correlation Coefficient | -0.211    | 1.000     | -.883(**) | -0.308    | -.452(*)  | -0.131     | -0.388        | .502(*)   | -0.042           |
|                   | Sig. (1-tailed)         | 0.225     | .         | 0.000     | 0.132     | 0.045     | 0.321      | 0.077         | 0.028     | 0.441            |
|                   | N                       | 15        | 15        | 15        | 15        | 15        | 15         | 15            | 15        | 15               |
| HbD               | Correlation Coefficient | 0.361     | -.883(**) | 1.000     | .475(*)   | .573(*)   | 0.281      | 0.252         | -.624(**) | 0.057            |
|                   | Sig. (1-tailed)         | 0.093     | 0.000     | .         | 0.037     | 0.013     | 0.155      | 0.183         | 0.006     | 0.420            |
|                   | N                       | 15        | 15        | 15        | 15        | 15        | 15         | 15            | 15        | 15               |
| HbA               | Correlation Coefficient | .969(**)  | -0.308    | .475(*)   | 1.000     | .911(**)  | .950(**)   | -0.244        | -.837(**) | .618(**)         |
|                   | Sig. (1-tailed)         | 0.000     | 0.132     | 0.037     | .         | 0.000     | 0.000      | 0.191         | 0.000     | 0.007            |
|                   | N                       | 15        | 15        | 15        | 15        | 15        | 15         | 15            | 15        | 15               |
| PSA               | Correlation Coefficient | .864(**)  | -.452(*)  | .573(*)   | .911(**)  | 1.000     | .875(**)   | -0.211        | -.857(**) | .486(*)          |
|                   | Sig. (1-tailed)         | 0.000     | 0.045     | 0.013     | 0.000     | .         | 0.000      | 0.225         | 0.000     | 0.033            |
|                   | N                       | 15        | 15        | 15        | 15        | 15        | 15         | 15            | 15        | 15               |
| Complexity        | Correlation Coefficient | .983(**)  | -0.131    | 0.281     | .950(**)  | .875(**)  | 1.000      | -0.252        | -.735(**) | .632(**)         |
|                   | Sig. (1-tailed)         | 0.000     | 0.321     | 0.155     | 0.000     | 0.000     | .          | 0.182         | 0.001     | 0.006            |
|                   | N                       | 15        | 15        | 15        | 15        | 15        | 15         | 15            | 15        | 15               |
| <i>logKeq</i>     | Correlation Coefficient | -0.177    | -0.388    | 0.252     | -0.244    | -0.211    | -0.252     | 1.000         | 0.114     | -0.256           |
|                   | Sig. (1-tailed)         | 0.264     | 0.077     | 0.183     | 0.191     | 0.225     | 0.182      | .             | 0.343     | 0.179            |
|                   | N                       | 15        | 15        | 15        | 15        | 15        | 15         | 15            | 15        | 15               |
| Lipinski          | Correlation Coefficient | -.747(**) | .502(*)   | -.624(**) | -.837(**) | -.857(**) | -.735(**)  | 0.114         | 1.000     | -0.429           |
|                   | Sig. (1-tailed)         | 0.001     | 0.028     | 0.006     | 0.000     | 0.000     | 0.001      | 0.343         | .         | 0.055            |
|                   | N                       | 15        | 15        | 15        | 15        | 15        | 15         | 15            | 15        | 15               |
| GI <sub>50</sub>  | Correlation Coefficient | .635(**)  | -0.042    | 0.057     | .618(**)  | .486(*)   | .632(**)   | -0.256        | -0.429    | 1.000            |
|                   | Sig. (1-tailed)         | 0.006     | 0.441     | 0.420     | 0.007     | 0.033     | 0.006      | 0.179         | 0.055     | .                |
|                   | N                       | 15        | 15        | 15        | 15        | 15        | 15         | 15            | 15        | 15               |

a. Correlations were significant at the  $*p < 0.05$  or  $**p < 0.01$  levels.
