# Supplementary material for: Evaluation of molecular descriptors for antitumor drugs with respect to noncovalent binding to DNA and antiproliferative activity
Source: PubMed Central journal article supplement (PMC2758867; doi:10.1186/1471-2210-9-11), 2009-09-16
Supplement: 1471-2210-9-11-S3.pdf [file 1471-2210-9-11-S3.pdf]

**Additional File 3.** Data outputs obtained in the multiple regression analyses to predict *logKeq* using molecular descriptors. Data are presented for the three subsets of drugs: DNA-binding (all) drugs, intercalators, and 'M-region' compounds. Equations used to predict *logKeq* are shown in Table 4.

### **DNA-binding drugs (model 1)**

#### **Variables Entered/Removed(b)**

| Model | Variables Entered | Variables Removed | Method |
|-------|-------------------|-------------------|--------|
| 1     | PSA. XlogP(a)     | .                 | Enter  |

a. All requested variables entered.

b. Dependent Variable: logKeq

#### **Model Summary(b)**

| Model | R       | R Square | Adjusted R Square | Std. Error of the Estimate |
|-------|---------|----------|-------------------|----------------------------|
| 1     | .603(a) | 0.364    | 0.258             | 0.74819                    |

a. Predictors: (Constant). PSArea. XlogP

b. Dependent Variable: logKeq

#### **ANOVA(b)**

| Model |            | Sum of Squares | df | Mean Square | F     | Sig.            |
|-------|------------|----------------|----|-------------|-------|-----------------|
| 1     | Regression | 3.840          | 2  | 1.920       | 3.430 | 6.60E-02<br>(a) |
|       | Residual   | 6.717          | 12 | 0.560       |       |                 |
|       | Total      | 10.558         | 14 |             |       |                 |

a. Predictors: (Constant). PSArea. XlogP

b. Dependent Variable: logKeq

#### **Coefficients**

| Model |            | Unstandardized Coefficients |            | Standardized Coefficients | t      | Sig.     | Collinearity Statistics |       |
|-------|------------|-----------------------------|------------|---------------------------|--------|----------|-------------------------|-------|
|       |            | B                           | Std. Error | Beta                      |        |          | Tolerance               | VIF   |
| 1     | (Constant) | 6.603                       | 0.465      |                           | 14.200 | 7.26E-09 |                         |       |
|       | XlogP      | -0.255                      | 0.100      | -0.648                    | -2.536 | 0.026    | 0.812                   | 1.232 |
|       | PSA        | -0.003                      | 0.002      | -0.432                    | -1.690 | 0.117    | 0.812                   | 1.232 |

## DNA-binding drugs (model 2)

### Variables Entered/Removed(b)

| Model | Variables Entered | Variables Removed | Method |
|-------|-------------------|-------------------|--------|
| 2     | XlogP(a)          | .                 | Enter  |

a. All requested variables entered.

b. Dependent Variable: logKeq

### Model Summary(b)

| Model | R       | R Square | Adjusted R Square | Std. Error of the Estimate |
|-------|---------|----------|-------------------|----------------------------|
| 2     | .461(a) | 0.212    | 0.152             | 0.79981                    |

a. Predictors: (Constant). XlogP

b. Dependent Variable: logKeq

### ANOVA(b)

| Model |            | Sum of Squares | df | Mean Square | F     | Sig.      |
|-------|------------|----------------|----|-------------|-------|-----------|
| 2     | Regression | 2.242          | 1  | 2.242       | 3.504 | 8.40.E-02 |
|       | Residual   | 8.316          | 13 | 0.640       |       | (a)       |
|       | Total      | 10.558         | 14 |             |       |           |

a. Predictors: (Constant). XlogP

b. Dependent Variable: logKeq

### Coefficients

| Model |            | Unstandardized Coefficients |            | Standardized Coefficients | t      | Sig.     | Correlations |         |        | Collinearity Statistics |       |
|-------|------------|-----------------------------|------------|---------------------------|--------|----------|--------------|---------|--------|-------------------------|-------|
|       |            |                             | Std. Error | Beta                      |        |          | Zero-order   | Partial | Part   | Tolerance               | VIF   |
| 2     | (Constant) | 5.895                       | 0.215      |                           | 27.412 | 6.9.E-13 |              |         |        |                         |       |
|       | XlogP      | -0.181                      | 0.097      | -0.461                    | -1.872 | 0.084    | -0.461       | -0.461  | -0.461 | 1.000                   | 1.000 |

## Intercalators

**Variables Entered/Removed(a)**

| Model | Variables Entered | Variables Removed | Method                                                                                      |
|-------|-------------------|-------------------|---------------------------------------------------------------------------------------------|
|       | XlogP             | .                 | Stepwise (Criteria: Probability-of-F-to-enter <= .050. Probability-of-F-to-remove >= .100). |

a. Dependent Variable: logKeq

**Model Summary(b)**

| Model | R       | R Square | Adjusted R Square | Std. Error of the Estimate |
|-------|---------|----------|-------------------|----------------------------|
|       | .662(a) | 0.438    | 0.368             | 0.67388                    |

a. Predictors: (Constant). XlogP

b. Dependent Variable: logKeq

**ANOVA(b)**

| Model      | Sum of Squares | df | Mean Square | F     | Sig.      |
|------------|----------------|----|-------------|-------|-----------|
| Regression | 2.833          | 1  | 2.833       | 6.238 | 3.70.E-02 |
| Residual   | 3.633          | 8  | 0.454       |       | (a)       |
| Total      | 6.466          | 9  |             |       |           |

a. Predictors: (Constant). XlogP

b. Dependent Variable: logKeq

**Coefficients**

| Model      | Unstandardized Coefficients |            | Standardized Coefficients | t      | Sig.     | Correlations |         |        | Collinearity Statistics |       |
|------------|-----------------------------|------------|---------------------------|--------|----------|--------------|---------|--------|-------------------------|-------|
|            | B                           | Std. Error | Beta                      |        |          | Zero-order   | Partial | Part   | Tolerance               | VIF   |
| (Constant) | 6.054                       | 0.229      |                           | 26.431 | 4.51E-09 |              |         |        |                         |       |
| XlogP      | -0.225                      | 0.090      | -0.662                    | -2.498 | 0.037    | -0.662       | -0.662  | -0.662 | 1.000                   | 1.000 |

**'M-region' compounds (model 1)**

**Variables Entered/Removed(b)**

| Model | Variables Entered  | Variables Removed | Method |
|-------|--------------------|-------------------|--------|
| 1     | XlogP, HbA, HbD(a) | .                 | Enter  |

a. All requested variables entered.

b. Dependent Variable: logKeq

**Model Summary(b)**

| Model | R       | R Square | Adjusted R Square | Std. Error of the Estimate |
|-------|---------|----------|-------------------|----------------------------|
| 1     | .984(a) | 0.968    | 0.944             | 0.20411                    |

a. Predictors: (Constant), XlogP, HbA, HbD

b. Dependent Variable: logKeq

**ANOVA(b)**

| Model |            | Sum of Squares | df | Mean Square | F      | Sig.     |
|-------|------------|----------------|----|-------------|--------|----------|
| 1     | Regression | 5.011          | 3  | 1.670       | 40.093 | 2.00E-03 |
|       | Residual   | 0.167          | 4  | 0.042       |        | (a)      |
|       | Total      | 5.177          | 7  |             |        |          |

a. Predictors: (Constant). XlogP. HbA. HbD

b. Dependent Variable: logKeq

**Coefficients**

| Model |            | Unstandardized Coefficients |            | Standardized Coefficients | t      | Sig.  | Collinearity Statistics |       |
|-------|------------|-----------------------------|------------|---------------------------|--------|-------|-------------------------|-------|
|       |            | B                           | Std. Error | Beta                      |        |       | Tolerance               | VIF   |
| 1     | (Constant) | 7.577                       | 0.298      |                           | 25.438 | 0.000 |                         |       |
|       | HbD        | 0.173                       | 0.066      | 0.470                     | 2.614  | 0.059 | 0.249                   | 4.011 |
|       | HbA        | -0.178                      | 0.020      | -1.230                    | -8.822 | 0.001 | 0.414                   | 2.417 |
|       | XlogP      | 0.128                       | 0.067      | 0.291                     | 1.904  | 0.130 | 0.344                   | 2.905 |

**'M-region' compounds (model 2)**

**Variables Entered/Removed(a)**

| Model | Variables Entered | Variables Removed | Method                                                                         |
|-------|-------------------|-------------------|--------------------------------------------------------------------------------|
| 2     | HbA               | .                 | Stepwise (Criteria: Probability-of-F-to-enter <= .050 of-F-to-remove >= .100). |

a. Dependent Variable: logKeq

**Model Summary(b)**

| Model | R       | R Square | Adjusted R Square | Std. Error of the Estimate |
|-------|---------|----------|-------------------|----------------------------|
| 2     | .955(a) | 0.912    | 0.897             | 0.27587                    |

a. Predictors: (Constant). HbA

b. Dependent Variable: logKeq

**ANOVA(b)**

| Model |            | Sum of Squares | df | Mean Square | F      | Sig.    |
|-------|------------|----------------|----|-------------|--------|---------|
| 2     | Regression | 4.721          | 1  | 4.721       | 62.032 | 2.20E-4 |
|       | Residual   | 0.457          | 6  | 0.076       |        | (a)     |
|       | Total      | 5.177          | 7  |             |        |         |

a. Predictors: (Constant). HbA

b. Dependent Variable: logKeq

**Coefficients**

| Model |            | Unstandardized Coefficients |            | Standardized Coefficients | t      | Sig.  | Collinearity Statistics |       |
|-------|------------|-----------------------------|------------|---------------------------|--------|-------|-------------------------|-------|
|       |            | B                           | Std. Error | Beta                      |        |       | Tolerance               | VIF   |
| 2     | (Constant) | 8.092                       | 0.303      |                           | 26.703 | 0.000 |                         |       |
|       | HbA        | -0.138                      | 0.018      | -0.955                    | -7.876 | 0.000 | 1.000                   | 1.000 |
