# Supplementary material for: Evaluation of molecular descriptors for antitumor drugs with respect to noncovalent binding to DNA and antiproliferative activity
Source: PubMed Central journal article supplement (PMC2758867; doi:10.1186/1471-2210-9-11), 2009-09-16
Supplement: 1471-2210-9-11-S4.pdf [file 1471-2210-9-11-S4.pdf]

**Additional File 4.** Data outputs generated by the principal component analyses of the molecular descriptors used to predict *logKeq*.

Data are presented for the three subsets of drugs: DNA-binding (all) drugs, intercalators and M-region compounds.

**DNA-binding drugs**

**Communalities**

|            | Initial | Extraction |
|------------|---------|------------|
| MW         | 1.000   | .989       |
| XlogP      | 1.000   | .907       |
| HbD        | 1.000   | .894       |
| HbA        | 1.000   | .946       |
| PSA        | 1.000   | .975       |
| complexity | 1.000   | .949       |

Extraction Method: Principal Component Analysis.

**Total Variance Explained**

| Component | Initial Eigenvalues |               |              | Extraction Sums of Squared Loadings |               |              | Rotation Sums of Squared Loadings |               |              |
|-----------|---------------------|---------------|--------------|-------------------------------------|---------------|--------------|-----------------------------------|---------------|--------------|
|           | Total               | % of Variance | Cumulative % | Total                               | % of Variance | Cumulative % | Total                             | % of Variance | Cumulative % |
| 1         | 4.453               | 74.222        | 74.222       | 4.453                               | 74.222        | 74.222       | 3.741                             | 62.343        | 62.343       |
| 2         | 1.208               | 20.132        | 94.354       | 1.208                               | 20.132        | 94.354       | 1.921                             | 32.010        | 94.354       |
| 3         | .251                | 4.182         | 98.536       |                                     |               |              |                                   |               |              |
| 4         | .070                | 1.160         | 99.695       |                                     |               |              |                                   |               |              |
| 5         | .014                | .227          | 99.922       |                                     |               |              |                                   |               |              |
| 6         | .005                | .078          | 100.000      |                                     |               |              |                                   |               |              |

Extraction Method: Principal Component Analysis.

**Component Matrix(a)**

|            | Component |       |
|------------|-----------|-------|
|            | 1         | 2     |
| MW         | .929      | .354  |
| XlogP      | -.463     | .832  |
| HbD        | .835      | -.444 |
| HbA        | .971      | .055  |
| PSA        | .988      | -.006 |
| complexity | .872      | .435  |

Extraction Method: Principal Component Analysis.

a 2 components extracted.

**Rotated Component Matrix(a)**

|            | Component |       |
|------------|-----------|-------|
|            | 1         | 2     |
| MW         | .987      | .122  |
| XlogP      | -.019     | -.952 |
| HbD        | .529      | .784  |
| HbA        | .884      | .406  |
| PSA        | .870      | .468  |
| complexity | .974      | .025  |

Extraction Method: Principal Component Analysis. Rotation Method: Varimax with Kaiser Normalization.

a Rotation converged in 3 iterations.

**Component Transformation Matrix**

| Component | 1    | 2     |
|-----------|------|-------|
| 1         | .883 | .469  |
| 2         | .469 | -.883 |

Extraction Method: Principal Component Analysis.

Rotation Method: Varimax with Kaiser Normalization

## **Intercalators**

### **Communalities**

|            | Initial | Extraction |
|------------|---------|------------|
| MW         | 1.000   | .989       |
| XlogP      | 1.000   | .919       |
| HbD        | 1.000   | .909       |
| HbA        | 1.000   | .963       |
| PSA        | 1.000   | .990       |
| complexity | 1.000   | .934       |

Extraction Method: Principal Component Analysis.

**Total Variance Explained**

| Component | Initial Eigenvalues |               |              | Extraction Sums of Squared Loadings |               |              | Rotation Sums of Squared Loadings |               |              |
|-----------|---------------------|---------------|--------------|-------------------------------------|---------------|--------------|-----------------------------------|---------------|--------------|
|           | Total               | % of Variance | Cumulative % | Total                               | % of Variance | Cumulative % | Total                             | % of Variance | Cumulative % |
| 1         | 4.664               | 77.740        | 77.740       | 4.664                               | 77.740        | 77.740       | 3.788                             | 63.125        | 63.125       |
| 2         | 1.041               | 17.347        | 95.087       | 1.041                               | 17.347        | 95.087       | 1.918                             | 31.961        | 95.087       |
| 3         | .251                | 4.180         | 99.266       |                                     |               |              |                                   |               |              |
| 4         | .040                | .671          | 99.937       |                                     |               |              |                                   |               |              |
| 5         | .004                | .059          | 99.995       |                                     |               |              |                                   |               |              |
| 6         | .000                | .005          | 100.000      |                                     |               |              |                                   |               |              |

Extraction Method: Principal Component Analysis.

**Component Matrix(a)**

|            | Component |       |
|------------|-----------|-------|
|            | 1         | 2     |
| MW         | .940      | .324  |
| XlogP      | -.537     | .794  |
| HbD        | .891      | -.340 |
| HbA        | .981      | .027  |
| PSA        | .995      | .024  |
| complexity | .864      | .434  |

Extraction Method: Principal Component Analysis.

a 2 components extracted.

**Rotated Component Matrix(a)**

|            | Component |       |
|------------|-----------|-------|
|            | 1         | 2     |
| MW         | .978      | .181  |
| XlogP      | -.077     | -.956 |
| HbD        | .608      | .734  |
| HbA        | .867      | .460  |
| PSA        | .878      | .468  |
| complexity | .965      | .047  |

Extraction Method: Principal Component Analysis.

Rotation Method: Varimax with Kaiser Normalization.

a Rotation converged in 3 iterations.

**Component Transformation Matrix**

| Component | 1    | 2     |
|-----------|------|-------|
| 1         | .871 | .492  |
| 2         | .492 | -.871 |

Extraction Method: Principal Component Analysis.

Rotation Method: Varimax with Kaiser Normalization.

---

**'M-region' compounds**

**Communalities**

|            | Initial | Extraction |
|------------|---------|------------|
| MW         | 1.000   | .981       |
| XlogP      | 1.000   | .855       |
| HbD        | 1.000   | .933       |
| HbA        | 1.000   | .929       |
| PSA        | 1.000   | .991       |
| complexity | 1.000   | .948       |

Extraction Method: Principal Component Analysis.

**Total Variance Explained**

| Component | Initial Eigenvalues |               |              | Extraction Sums of Squared Loadings |               |              | Rotation Sums of Squared Loadings |               |              |
|-----------|---------------------|---------------|--------------|-------------------------------------|---------------|--------------|-----------------------------------|---------------|--------------|
|           | Total               | % of Variance | Cumulative % | Total                               | % of Variance | Cumulative % | Total                             | % of Variance | Cumulative % |
| 1         | 3.850               | 64.164        | 64.164       | 3.850                               | 64.164        | 64.164       | 3.847                             | 64.109        | 64.109       |
| 2         | 1.789               | 29.814        | 93.978       | 1.789                               | 29.814        | 93.978       | 1.792                             | 29.869        | 93.978       |
| 3         | .281                | 4.691         | 98.669       |                                     |               |              |                                   |               |              |
| 4         | .063                | 1.056         | 99.725       |                                     |               |              |                                   |               |              |
| 5         | .010                | .170          | 99.895       |                                     |               |              |                                   |               |              |
| 6         | .006                | .105          | 100.000      |                                     |               |              |                                   |               |              |

Extraction Method: Principal Component Analysis.

**Component Matrix(a)**

|            | Component |       |
|------------|-----------|-------|
|            | 1         | 2     |
| MW         | .986      | -.091 |
| XlogP      | .352      | -.855 |
| HbD        | .223      | .940  |
| HbA        | .905      | .333  |
| PSA        | .992      | .086  |
| complexity | .949      | -.217 |

Extraction Method: Principal Component Analysis.

a 2 components extracted.

**Rotated Component Matrix(a)**

|            | Component |       |
|------------|-----------|-------|
|            | 1         | 2     |
| MW         | .982      | -.130 |
| XlogP      | .317      | -.869 |
| HbD        | .261      | .930  |
| HbA        | .917      | .297  |
| PSA        | .995      | .046  |
| complexity | .940      | -.255 |

Extraction Method: Principal Component Analysis.

Rotation Method: Varimax with Kaiser Normalization.

a Rotation converged in 3 iterations.

**Component Transformation Matrix**

| Component | 1    | 2     |
|-----------|------|-------|
| 1         | .999 | -.040 |
| 2         | .040 | .999  |

Extraction Method: Principal Component Analysis.

Rotation Method: Varimax with Kaiser Normalization.
