# Supplementary material for: Evaluation of molecular descriptors for antitumor drugs with respect to noncovalent binding to DNA and antiproliferative activity
Source: PubMed Central journal article supplement (PMC2758867; doi:10.1186/1471-2210-9-11), 2009-09-16
Supplement: 1471-2210-9-11-S5.pdf [file 1471-2210-9-11-S5.pdf]

**Additional File 5.** Data outputs obtained in the multiple regression analyses to predict cytotoxicity ( $GI_{50}$ ) using structure-based molecular descriptors and the drug-DNA equilibrium binding constant ( $logK_{eq}$ ). Data are presented for the three subsets of drugs: DNA-binding (all) drugs, intercalators, and ‘M-region’ compounds. Equations used to predict  $GI_{50}$  are shown in Table 5.

### DNA-binding drugs

#### Variables Entered/Removed(b)

| Model | Variables Entered  | Variables Removed | Method |
|-------|--------------------|-------------------|--------|
|       | PSA. complexity(a) | .                 | Enter  |

a. All requested variables entered.

b. Dependent Variable:  $GI_{50}$

#### Model Summary(b)

| Model | R       | R Square | Adjusted R Square | Std. Error of the Estimate |
|-------|---------|----------|-------------------|----------------------------|
|       | .713(a) | 0.508    | 0.426             | 1.0883                     |

a. Predictors: (Constant). PSA. complexity

b. Dependent Variable:  $GI_{50}$

#### ANOVA(b)

| Model      | Sum of Squares | df | Mean Square | F     | Sig.         |
|------------|----------------|----|-------------|-------|--------------|
| Regression | 14.679         | 2  | 7.339       | 6.196 | 1.4.E-02 (a) |
| Residual   | 14.214         | 12 | 1.185       |       |              |
| Total      | 28.893         | 14 |             |       |              |

a. Predictors: (Constant). PSA. complexity

b. Dependent Variable:  $GI_{50}$

#### Coefficients(a)

| Model      | Unstandardized Coefficients |            | Standardized Coefficients | t      | Sig.  | Collinearity Statistics |       |
|------------|-----------------------------|------------|---------------------------|--------|-------|-------------------------|-------|
|            | B                           | Std. Error | Beta                      |        |       | Tolerance               | VIF   |
| (Constant) | 5.688                       | 0.591      |                           | 9.620  | 0.000 |                         |       |
| complexity | 0.002                       | 0.001      | 1.220                     | 3.224  | 0.007 | 0.286                   | 3.495 |
| PSA        | -0.008                      | 0.004      | -0.745                    | -1.968 | 0.073 | 0.286                   | 3.495 |

## Intercalators

### Variables Entered/Removed(b)

| Model | Variables Entered          | Variables Removed | Method |
|-------|----------------------------|-------------------|--------|
|       | PSA. logKeq. complexity(a) | .                 | Enter  |

a. All requested variables entered.

b. Dependent Variable: GI50

### Model Summary(b)

| Model | R       | R Square | Adjusted R Square | Std. Error of the Estimate |
|-------|---------|----------|-------------------|----------------------------|
|       | .894(a) | 0.800    | 0.700             | 0.5298                     |

a. Predictors: (Constant). PSA. logKeq. complexity

b. Dependent Variable: GI50

### ANOVA(b)

| Model      | Sum of Squares | df | Mean Square | F     | Sig.         |
|------------|----------------|----|-------------|-------|--------------|
| Regression | 6.727          | 3  | 2.242       | 7.990 | 1.6.E-02 (a) |
| Residual   | 1.684          | 6  | 0.281       |       |              |
| Total      | 8.411          | 9  |             |       |              |

a. Predictors: (Constant). PSA. logKeq. complexity

b. Dependent Variable: GI50

### Coefficients(a)

| Model      | Unstandardized Coefficients |            | Standardized Coefficients | t      | Sig.  | Collinearity Statistics |       |
|------------|-----------------------------|------------|---------------------------|--------|-------|-------------------------|-------|
|            | B                           | Std. Error | Beta                      |        |       | Tolerance               | VIF   |
| (Constant) | 1.977                       | 1.319      |                           | 1.499  | 0.185 |                         |       |
| logKeq     | 0.742                       | 0.219      | 0.650                     | 3.391  | 0.015 | 0.908                   | 1.102 |
| complexity | 0.002                       | 0.000      | 1.558                     | 4.316  | 0.005 | 0.256                   | 3.905 |
| PSA        | -0.008                      | 0.002      | -1.256                    | -3.482 | 0.013 | 0.256                   | 3.899 |

## 'M-region' compounds

### Variables Entered/Removed(b)

| Model | Variables Entered     | Variables Removed | Method |
|-------|-----------------------|-------------------|--------|
|       | complexity. logKeq(a) | .                 | Enter  |

a. All requested variables entered.

b. Dependent Variable: GI50

### Model Summary(b)

| Model | R       | R Square | Adjusted R Square | Std. Error of the Estimate |
|-------|---------|----------|-------------------|----------------------------|
|       | .984(a) | 0.968    | 0.955             | 0.1247                     |

a. Predictors: (Constant). complexity. logKeq

b. Dependent Variable: GI50

### ANOVA(b)

| Model      | Sum of Squares | df | Mean Square | F      | Sig.         |
|------------|----------------|----|-------------|--------|--------------|
| Regression | 2.362          | 2  | 1.181       | 76.007 | 1.8.E-04 (a) |
| Residual   | 0.078          | 5  | 0.016       |        |              |
| Total      | 2.440          | 7  |             |        |              |

a. Predictors: (Constant). complexity. logKeq

b. Dependent Variable: GI50

### Coefficients(a)

| Model      | Unstandardized Coefficients |            | Standardized Coefficients | t     | Sig.  | Collinearity Statistics |       |
|------------|-----------------------------|------------|---------------------------|-------|-------|-------------------------|-------|
|            | B                           | Std. Error | Beta                      |       |       | Tolerance               | VIF   |
| (Constant) | 6.478                       | 0.746      |                           | 8.680 | 0.000 |                         |       |
| logKeq     | 0.021                       | 0.102      | 0.031                     | 0.207 | 0.844 | 0.287                   | 3.483 |
| complexity | 0.001                       | 0.000      | 1.010                     | 6.780 | 0.001 | 0.287                   | 3.483 |
