# Supplementary material for: Evaluation of molecular descriptors for antitumor drugs with respect to noncovalent binding to DNA and antiproliferative activity
Source: PubMed Central journal article supplement (PMC2758867; doi:10.1186/1471-2210-9-11), 2009-09-16
Supplement: 1471-2210-9-11-S6.pdf [file 1471-2210-9-11-S6.pdf]

**Additional File 6.** Data outputs generated by the principal component analyses of the structure-based molecular descriptors and the drug-DNA equilibrium binding const (*logKeq*) used to predict cytotoxicity ( $GI_{50}$ ). Data are presented for the three subsets of drugs: DNA-binding (all) drugs, intercalators and ‘M-region’ compounds.

### DNA-binding drugs

#### Communalities

|            | Initial | Extraction |
|------------|---------|------------|
| MW         | 1.000   | .962       |
| XlogP      | 1.000   | .846       |
| HbD        | 1.000   | .795       |
| HbA        | 1.000   | .967       |
| PSA        | 1.000   | .958       |
| complexity | 1.000   | .893       |
| logKeq     | 1.000   | .773       |
| Lipinski   | 1.000   | .723       |

Extraction Method: Principal Component Analysis.

#### Total Variance Explained

| Component | Initial Eigenvalues |               |              | Extraction Sums of Squared Loadings |               |              | Rotation Sums of Squared Loadings |               |              |
|-----------|---------------------|---------------|--------------|-------------------------------------|---------------|--------------|-----------------------------------|---------------|--------------|
|           | Total               | % of Variance | Cumulative % | Total                               | % of Variance | Cumulative % | Total                             | % of Variance | Cumulative % |
| 1         | 5.118               | 63.979        | 63.979       | 5.118                               | 63.979        | 63.979       | 5.056                             | 63.204        | 63.204       |
| 2         | 1.799               | 22.493        | 86.473       | 1.799                               | 22.493        | 86.473       | 1.861                             | 23.268        | 86.473       |
| 3         | .508                | 6.354         | 92.827       |                                     |               |              |                                   |               |              |
| 4         | .321                | 4.014         | 96.840       |                                     |               |              |                                   |               |              |
| 5         | .209                | 2.610         | 99.450       |                                     |               |              |                                   |               |              |
| 6         | .033                | .407          | 99.857       |                                     |               |              |                                   |               |              |
| 7         | .008                | .095          | 99.952       |                                     |               |              |                                   |               |              |
| 8         | .004                | .048          | 100.000      |                                     |               |              |                                   |               |              |

Extraction Method: Principal Component Analysis.

**Component Matrix(a)**

|            | Component |       |
|------------|-----------|-------|
|            | 1         | 2     |
| MW         | .923      | .332  |
| XlogP      | -.464     | .794  |
| HbD        | .817      | -.357 |
| HbA        | .981      | .072  |
| PSA        | .979      | -.014 |
| complexity | .870      | .369  |
| logKeq     | -.193     | -.858 |
| Lipinski   | -.819     | .231  |

Extraction Method: Principal Component Analysis.  
a 2 components extracted.

**Rotated Component Matrix(a)**

|            | Component |       |
|------------|-----------|-------|
|            | 1         | 2     |
| MW         | .960      | .203  |
| XlogP      | -.351     | .850  |
| HbD        | .760      | -.466 |
| HbA        | .982      | -.063 |
| PSA        | .967      | -.148 |
| complexity | .912      | .247  |
| logKeq     | -.308     | -.823 |
| Lipinski   | -.779     | .341  |

Extraction Method: Principal Component Analysis.  
Rotation Method: Varimax with Kaiser Normalization.  
a Rotation converged in 3 iterations.

**Component Transformation Matrix**

| Component | 1    | 2     |
|-----------|------|-------|
| 1         | .991 | -.137 |
| 2         | .137 | .991  |

Extraction Method: Principal Component Analysis.  
Rotation Method: Varimax with Kaiser Normalization.

## Intercalators

**Communalities**

|            | Initial | Extraction |
|------------|---------|------------|
| MW         | 1.000   | .972       |
| XlogP      | 1.000   | .819       |
| HbD        | 1.000   | .790       |
| HbA        | 1.000   | .974       |
| PSA        | 1.000   | .986       |
| complexity | 1.000   | .871       |
| logKeq     | 1.000   | .873       |
| Lipinski   | 1.000   | .738       |

Extraction Method: Principal Component Analysis.

**Total Variance Explained**

| Component | Initial Eigenvalues |               |              | Extraction Sums of Squared Loadings |               |              | Rotation Sums of Squared Loadings |               |              |
|-----------|---------------------|---------------|--------------|-------------------------------------|---------------|--------------|-----------------------------------|---------------|--------------|
|           | Total               | % of Variance | Cumulative % | Total                               | % of Variance | Cumulative % | Total                             | % of Variance | Cumulative % |
| 1         | 5.267               | 65.837        | 65.837       | 5.267                               | 65.837        | 65.837       | 4.749                             | 59.359        | 59.359       |
| 2         | 1.758               | 21.972        | 87.809       | 1.758                               | 21.972        | 87.809       | 2.276                             | 28.450        | 87.809       |
| 3         | .578                | 7.229         | 95.038       |                                     |               |              |                                   |               |              |
| 4         | .258                | 3.222         | 98.260       |                                     |               |              |                                   |               |              |
| 5         | .122                | 1.520         | 99.780       |                                     |               |              |                                   |               |              |
| 6         | .015                | .191          | 99.971       |                                     |               |              |                                   |               |              |
| 7         | .002                | .027          | 99.998       |                                     |               |              |                                   |               |              |
| 8         | .000                | .002          | 100.000      |                                     |               |              |                                   |               |              |

Extraction Method: Principal Component Analysis.

**Component Matrix(a)**

|            | Component |       |
|------------|-----------|-------|
|            | 1         | 2     |
| MW         | .903      | .395  |
| XlogP      | -.593     | .684  |
| HbD        | .884      | -.095 |
| HbA        | .981      | .105  |
| PSA        | .981      | .153  |
| complexity | .834      | .420  |
| logKeq     | .242      | -.902 |
| Lipinski   | -.799     | .316  |

Extraction Method: Principal Component Analysis.

a 2 components extracted.

**Rotated Component Matrix(a)**

|            | Component |       |
|------------|-----------|-------|
|            | 1         | 2     |
| MW         | .986      | -.018 |
| XlogP      | -.284     | -.859 |
| HbD        | .780      | .427  |
| HbA        | .946      | .280  |
| PSA        | .965      | .236  |
| complexity | .931      | -.067 |
| logKeq     | -.123     | .926  |
| Lipinski   | -.616     | -.599 |

Extraction Method: Principal Component Analysis.

Rotation Method: Varimax with Kaiser Normalization.

a Rotation converged in 3 iterations.

**Component Transformation Matrix**

| Component | 1    | 2     |
|-----------|------|-------|
| 1         | .923 | .384  |
| 2         | .384 | -.923 |

Extraction Method: Principal Component Analysis.

Rotation Method: Varimax with Kaiser Normalization.

## 'M-region' compounds

Correlation Matrix(a) is not positive definite when Lipinski's score is introduced

### Communalities (with Lipinski's score)

|            | Initial | Extraction |
|------------|---------|------------|
| MW         | 1,000   | ,955       |
| XlogP      | 1,000   | ,825       |
| HbD        | 1,000   | ,910       |
| HbA        | 1,000   | ,955       |
| PSArea     | 1,000   | ,976       |
| complexity | 1,000   | ,929       |
| logKeq     | 1,000   | ,965       |
| Lipinski   | 1,000   | ,464       |

Extraction Method: Principal Component Analysis.

### Communalities (without Lipinski's score)

|            | Initial | Extraction |
|------------|---------|------------|
| MW         | 1.000   | .978       |
| XlogP      | 1.000   | .857       |
| HbD        | 1.000   | .920       |
| HbA        | 1.000   | .940       |
| PSArea     | 1.000   | .987       |
| complexity | 1.000   | .945       |
| logKeq     | 1.000   | .958       |

Extraction Method: Principal Component Analysis.

### Total Variance Explained (without Lipinski's score)

| Component | Initial Eigenvalues |               |              | Extraction Sums of Squared Loadings |               |              | Rotation Sums of Squared Loadings |               |              |
|-----------|---------------------|---------------|--------------|-------------------------------------|---------------|--------------|-----------------------------------|---------------|--------------|
|           | Total               | % of Variance | Cumulative % | Total                               | % of Variance | Cumulative % | Total                             | % of Variance | Cumulative % |
| 1         | 4.765               | 68.071        | 68.071       | 4.765                               | 68.071        | 68.071       | 4.765                             | 68.069        | 68.069       |
| 2         | 1.821               | 26.012        | 94.083       | 1.821                               | 26.012        | 94.083       | 1.821                             | 26.014        | 94.083       |
| 3         | .284                | 4.060         | 98.143       |                                     |               |              |                                   |               |              |
| 4         | .105                | 1.507         | 99.650       |                                     |               |              |                                   |               |              |
| 5         | .017                | .237          | 99.887       |                                     |               |              |                                   |               |              |
| 6         | .007                | .099          | 99.986       |                                     |               |              |                                   |               |              |
| 7         | .001                | .014          | 100.000      |                                     |               |              |                                   |               |              |

Extraction Method: Principal Component Analysis.

**Component Matrix(a)**

|            | Component |       |
|------------|-----------|-------|
|            | 1         | 2     |
| MW         | .976      | .159  |
| XlogP      | .285      | .881  |
| HbD        | .279      | -.918 |
| HbA        | .931      | -.271 |
| PSA        | .994      | -.016 |
| complexity | .930      | .283  |
| logKeq     | -.967     | .151  |

Extraction Method: Principal Component Analysis.  
a 2 components extracted.

**Rotated Component Matrix(a)**

|            | Component |       |
|------------|-----------|-------|
|            | 1         | 2     |
| MW         | .975      | .166  |
| XlogP      | .279      | .882  |
| HbD        | .284      | -.916 |
| HbA        | .932      | -.265 |
| PSA        | .994      | -.010 |
| complexity | .928      | .289  |
| logKeq     | -.968     | .145  |

Extraction Method: Principal Component Analysis.  
Rotation Method: Varimax with Kaiser Normalization.  
a Rotation converged in 3 iterations.

**Component Transformation Matrix**

| Component | 1     | 2     |
|-----------|-------|-------|
| 1         | 1.000 | .006  |
| 2         | -.006 | 1.000 |

Extraction Method: Principal Component Analysis.  
Rotation Method: Varimax with Kaiser Normalization.

---
